# Supplementary material for: Ratiometric SERS detection of N2H4 by porous Ag(i)-linked Waugh-type polyoxometalate as an efficient label-free substrate
Source: Royal Society of Chemistry journal article supplement (doi:10.1039/d2tc05148f), 2023-01-01
Supplement: d2tc05148f1.pdf [file d2tc05148f1.pdf]

*Supporting Information*

**Ratiometric SERS Detection of N<sub>2</sub>H<sub>4</sub> by Porous Ag(I)-linked  
Waugh-type Polyoxometalate as Efficient Label-free  
Substrate**

Jie Wang, Jia-Yuan Zhang, Wen-Jing Zhu, Bin Qi, Jun-Peng Wang,  
Guang-Gang Gao,\* Lin-Lin Fan, and Hong Liu\*

*School of Materials Science and Engineering, University of Jinan, Jinan, 250022,  
China.*

*\* Corresponding authors.*

*E-mail: mse\_gaogg@ujn.edu.cn (G.-G. Gao), mse\_liuh@ujn.edu.cn (H. Liu).*

# Contents

## Chemicals and materials

## Characterization methods

## X-ray crystallography

## Supporting Figures

**Fig. S1** Coordination numbers and modes of  $\text{MnMo}_9$  and  $\text{Ag(I)}$  in Compound  $\text{Ag}_6\text{MnMo}_9$ . Symmetric codes: #1  $2-x, y, 1/2-z$ ; #2  $3/2-x, 1/2-y, -1/2+z$ ; #3  $1-x, y, 1/2-z$ ; #4  $-1+x, y, z$ ; #5  $-1/2+x, 1/2-y, 1-z$ ; #6  $-1/2+x, 1/2+y, z$ ; #7  $1-x, 1-y, 1/2+z$ .

**Fig. S2** Representation of 3D structure of  $\text{Ag}_6\text{MnMo}_9$  along  $c$  axis.

**Fig. S3** Structures of left- and right- handed  $\text{MnMo}_9$  polyoxoanions located in  $\text{Ag}_3\text{MnMo}_9$ .

**Fig. S4** (a) Representation of different chiral  $[\text{MnMo}_9\text{O}_{32}]^{6-}$  polyoxoanions in  $\text{Ag}_3\text{MnMo}_9$ . (b) 3D framework of  $\text{Ag}_3\text{MnMo}_9$  filled with  $[\text{Ag}_3(\text{trz})_3]^{3+}$ . The hydrogen atoms are omitted for clarity.

**Fig. S5** Comparative FTIR curves for  $\text{Ag}_6\text{MnMo}_9$  and  $\text{MnMo}_9$  (a) and  $\text{Ag}_3\text{MnMo}_9$ ,  $\text{MnMo}_9$  and  $\text{trz}$  (b).

**Fig. S6** (a) SERS spectra of  $\text{Ag}_3\text{MnMo}_9$  after reactions with different concentrations of  $\text{N}_2\text{H}_4$  ( $10^{-4}$ -1.0 mg/L).

**Fig. S7** The Raman and SERS spectra of  $\text{Ag}_6\text{MnMo}_9$  and  $\text{Ag}_3\text{MnMo}_9$  in the presence of  $10^{-3}$  mg/L  $\text{N}_2\text{H}_4$ , respectively.

**Fig. S8** SERS spectra of  $\text{Ag}_6\text{MnMo}_9$  in different solvents (a) and different

concentrations of  $\text{N}_2\text{H}_4$  ( $10^{-4}$ -1.0 mg/L) (b).

**Fig. S9** The TEM image (a) and PXRD pattern (b) of  $\text{Ag}_6\text{MnMo}_9$  in the presence of 1.0 mg/L  $\text{N}_2\text{H}_4$ .

**Fig. S10** Raman spectra of  $\text{Ag}_6\text{MnMo}_9$  at laser power (a) and sampling time (b). (c) A set of Raman spectra of  $\text{Ag}_6\text{MnMo}_9$  from 10 random positions. (d) The Raman intensity at  $945\text{ cm}^{-1}$  from 10 random positions.

**Fig. S11** (a) A set of SERS spectra of  $\text{Ag}_6\text{MnMo}_9$  exposed  $10^{-3}$  mg/L  $\text{N}_2\text{H}_4$  from 20 random positions. (b) The SERS intensity at  $945\text{ cm}^{-1}$  from 20 random positions.

**Fig. S12** The histogram of SERS signal at  $945\text{ cm}^{-1}$  of three  $\text{Ag}_6\text{MnMo}_9$  SERS substrates exposed to  $10^{-3}$  mg/L  $\text{N}_2\text{H}_4$ .

**Fig. S13** TEM images of  $\text{Ag}_6\text{MnMo}_9$  before (a) and after (b)  $\text{N}_2\text{H}_4$  treatment (inset of b: The HRTEM of  $\text{Ag}_6\text{MnMo}_9$  after  $\text{N}_2\text{H}_4$  treatment). The overlay distribution of elements (c) and elemental mappings of Mo (d), Ag (e) and Mn (f).

**Fig. S14** AgNPs size distribution for  $\text{Ag}_6\text{MnMo}_9$  after  $\text{N}_2\text{H}_4$  treatment.

**Fig. S15** PXRD patterns of  $\text{Ag}_6\text{MnMo}_9$  without and with the presence of  $\text{N}_2\text{H}_4$ .

**Fig. S16** XPS survey spectra of  $\text{Ag}_6\text{MnMo}_9$  without and with the presence of  $\text{N}_2\text{H}_4$ .

**Fig. S17** XPS analysis of  $\text{Ag}_6\text{MnMo}_9$  before and after reduction by  $\text{N}_2\text{H}_4$  for O 1s.

**Fig. S18** TEM images of **Ag<sub>3</sub>MnMo<sub>9</sub>** before (a) and after (b) N<sub>2</sub>H<sub>4</sub> treatment. The overlay distribution of elements (c) and elemental mappings of Mo (d), Ag (e) and Mn (f) in **Ag<sub>3</sub>MnMo<sub>9</sub>**.

**Fig. S19** (a) XPS survey spectra of **Ag<sub>3</sub>MnMo<sub>9</sub>** before and after reduction by N<sub>2</sub>H<sub>4</sub>; the core level XPS spectra for Mo 3d (b), Mn 2p (c) and Ag 3d (d).

**Fig. S20** UV-vis absorbance spectra of **Ag<sub>6</sub>MnMo<sub>9</sub>** and its reduced state by reaction with N<sub>2</sub>H<sub>4</sub>.

**Table S1** Crystal Data and Structure for complexes **Ag<sub>6</sub>MnMo<sub>9</sub>** and **Ag<sub>3</sub>MnMo<sub>9</sub>**.

**Table S2** Raman and SERS vibrational frequencies (cm<sup>-1</sup>) of **Ag<sub>6</sub>MnMo<sub>9</sub>**<sup>a</sup>.

**Table S3** Comparison of different methods for detecting N<sub>2</sub>H<sub>4</sub>.

## Chemicals and materials

All reagents were purchased commercially and used without further purification.  $(\text{NH}_4)_6[\text{MnMo}_9\text{O}_{32}] \cdot 8\text{H}_2\text{O}$  ( $\text{MnMo}_9$ ) was prepared according to the literature method.<sup>1</sup>  $\text{AgNO}_3$  (99%) and  $\text{MnSO}_4 \cdot \text{H}_2\text{O}$  (99%) were purchased from Macklin.  $(\text{NH}_4)_6\text{Mo}_7\text{O}_{24} \cdot 4\text{H}_2\text{O}$  was purchased from Sigma-Aldrich.  $\text{NH}_4\text{OH}$ , Phenethylamine (PEA), triethylamine (TEA), N,N-Dimethylformamide (DMF),  $(\text{NH}_4)_2\text{S}_2\text{O}_8$  (98%), 1,2,4-triazole (trz, 98%), acetonitrile, acetic acid and  $\text{N}_2\text{H}_4$  were obtained from Alfa Aesar.

## Characterization methods

The morphologies of the samples were studied on the transmission electron microscopy (TEM, JEOL 2010, 200 kV). The powder X-ray diffraction (PXRD) patterns were performed on Rigaku/Max-2550 with Cu  $K\alpha$  radiation ( $\lambda = 1.7890 \text{ \AA}$ ). The element distribution was measured by Energy dispersive spectrometer (EDS) on JEOL TEM. X-ray photoelectron spectroscopy (XPS) scans were carried on multifunctional imaging electron spectrometer (Thermo ESCALAB 250XI). The elemental analyses of H and N were conducted on a Vario EL III elemental analyzer, and those of Mo, Mn and Ag were analyzed on a Jarrel-AshJ-A1100 (ICP) atomic emission spectrometer. SERS testing was performed using a Raman spectrometer (Labramis, Horiba Jobbin Yvon, Paris, France). The wavelength was 532 nm. The laser power was 5 mW for all experiments. Spectra were collected with a 50-object lens for 4 s.

## **X-ray crystallography**

Crystal data were collected on an Agilent Technology Eos Dual system with focusing multilayer mirror optics and a Cu K $\alpha$  source of  $\lambda = 1.54184 \text{ \AA}$ . Empirical absorption corrections were applied to the intensities using the SADABS program. The structures were solved using the program SHELXS97 and refined with the program SHELXL-97. The positions of the metal atoms and their first coordination spheres were located from direct-methods. Other non-hydrogen atoms were found in alternating difference Fourier syntheses and least-squares refinement cycles. During the final cycles, except for some solvent molecules, all other non-hydrogen atoms were refined anisotropically. Hydrogen atoms were placed in calculated positions refined using idealized geometries and assigned fixed isotropic displacement parameters. CCDC number of 2086764 for **Ag<sub>6</sub>MnMo<sub>9</sub>** and 2097830 for **Ag<sub>3</sub>MnMo<sub>9</sub>**.

## Supporting figures

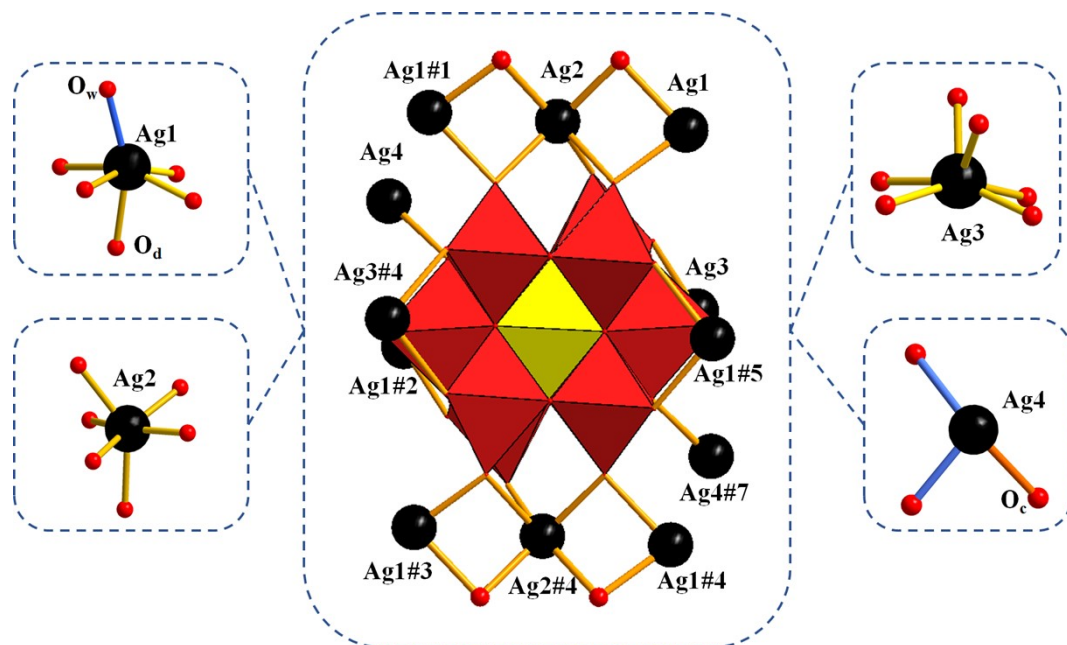

**Fig. S1** Coordination environment of Ag<sup>+</sup> and MnMo<sub>9</sub> polyoxoanion. Symmetric code:  
 #1 2-x, y, 1/2-z; #2 3/2-x, 1/2-y, -1/2+z; #3 1-x, y, 1/2-z; #4 -1+x, y, z; #5 -1/2+x, 1/2-  
 y, 1-z; #6 -1/2+x, 1/2+y, z; #7 1-x, 1-y, 1/2+z.

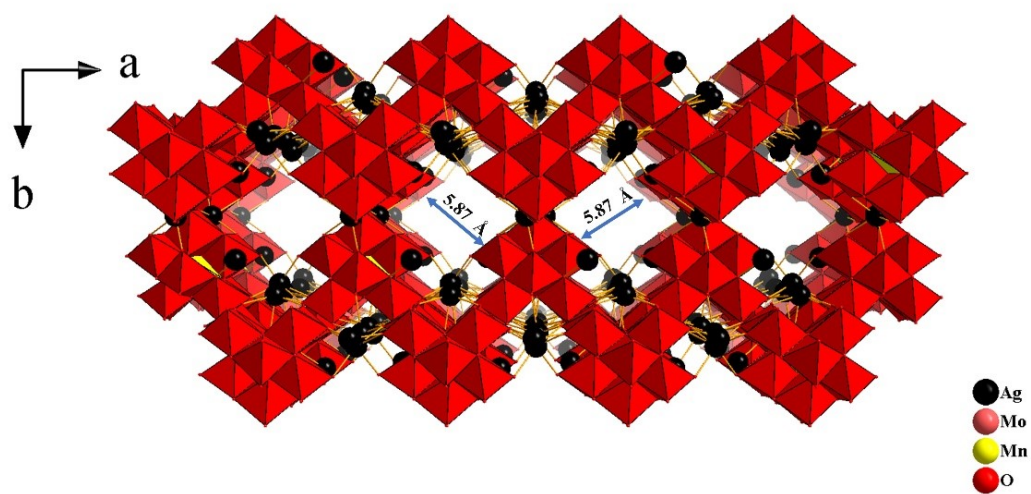

Fig. S2 Representation of 3D structure of  $\text{Ag}_6\text{MnMo}_9$  along axis  $c$ .



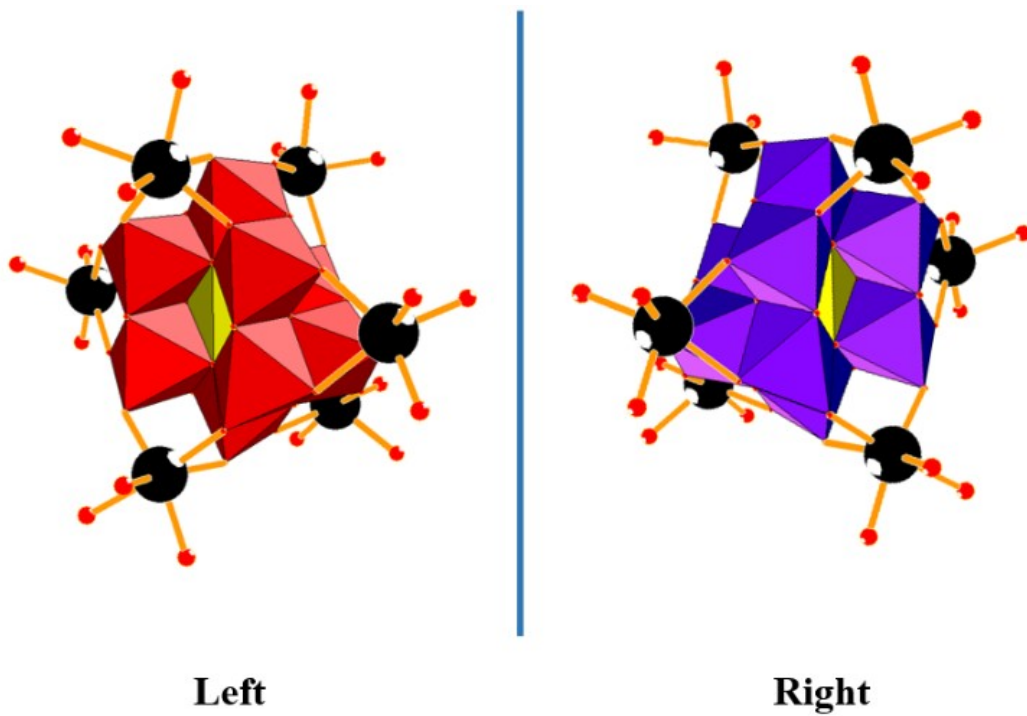

**Fig. S3** Structures of left- and right- handed MnMo<sub>9</sub> polyoxoanions located in **Ag<sub>3</sub>MnMo<sub>9</sub>**.

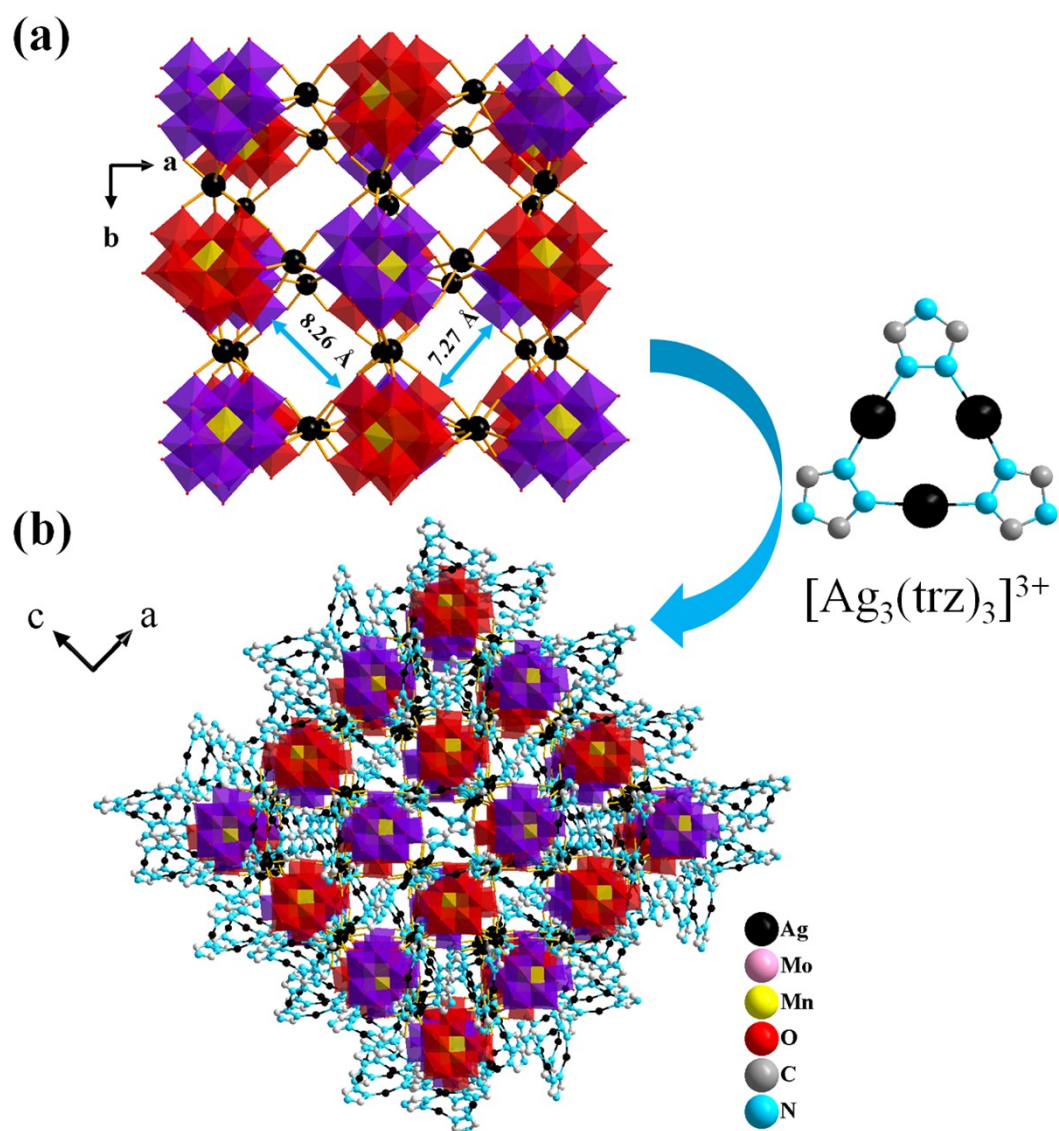

**Fig. S4** (a) Representation of different chiral  $[\text{MnMo}_9\text{O}_{32}]^{6-}$  polyoxoanions in  $\text{Ag}_3\text{MnMo}_9$ . (b) 3D framework of  $\text{Ag}_3\text{MnMo}_9$  filled with  $[\text{Ag}_3(\text{trz})_3]^{3+}$ .

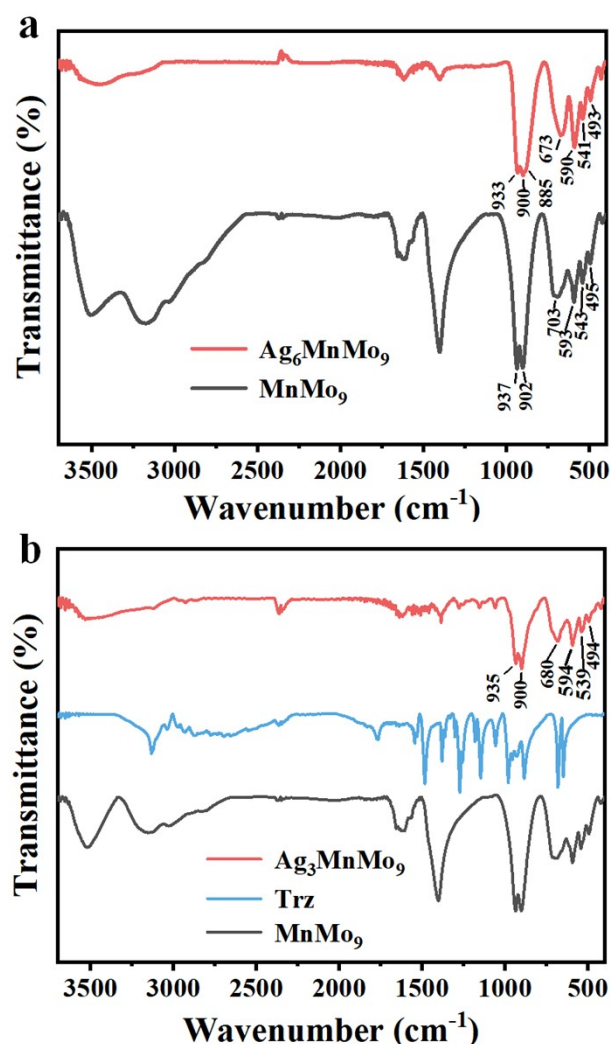

**Fig. S5** Comparative FTIR curves for **Ag<sub>6</sub>MnMo<sub>9</sub>** and **MnMo<sub>9</sub>** (a) and **Ag<sub>3</sub>MnMo<sub>9</sub>**, **MnMo<sub>9</sub>** and **trz** (b).

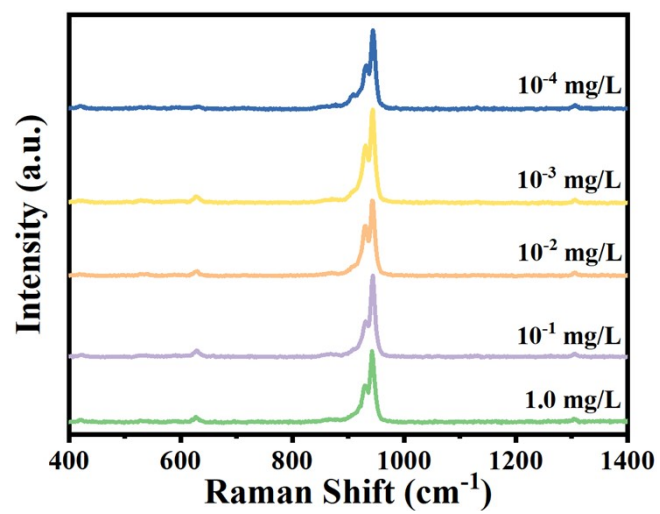

**Fig. S6 (a)** SERS spectra of  $\text{Ag}_3\text{MnMo}_9$  after reactions with different concentrations of  $\text{N}_2\text{H}_4$  ( $10^{-4}$ -1.0 mg/L).

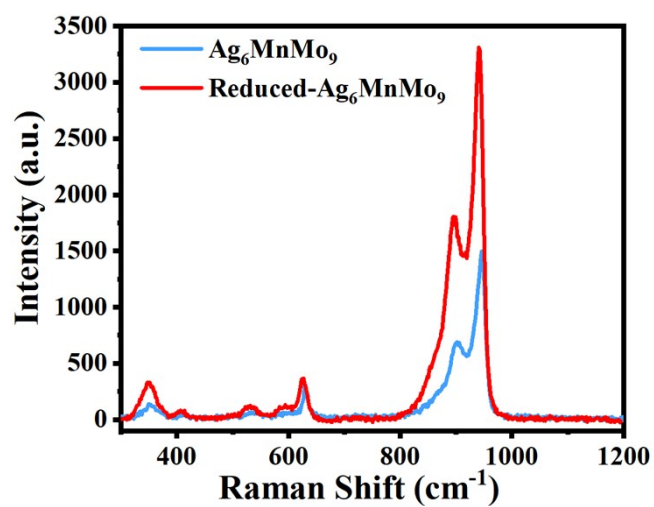

**Fig. S7** The Raman and SERS spectra of  $\text{Ag}_6\text{MnMo}_9$  and  $\text{Ag}_6\text{MnMo}_9$  in the presence of  $10^{-3}$  mg/L  $\text{N}_2\text{H}_4$ , respectively.

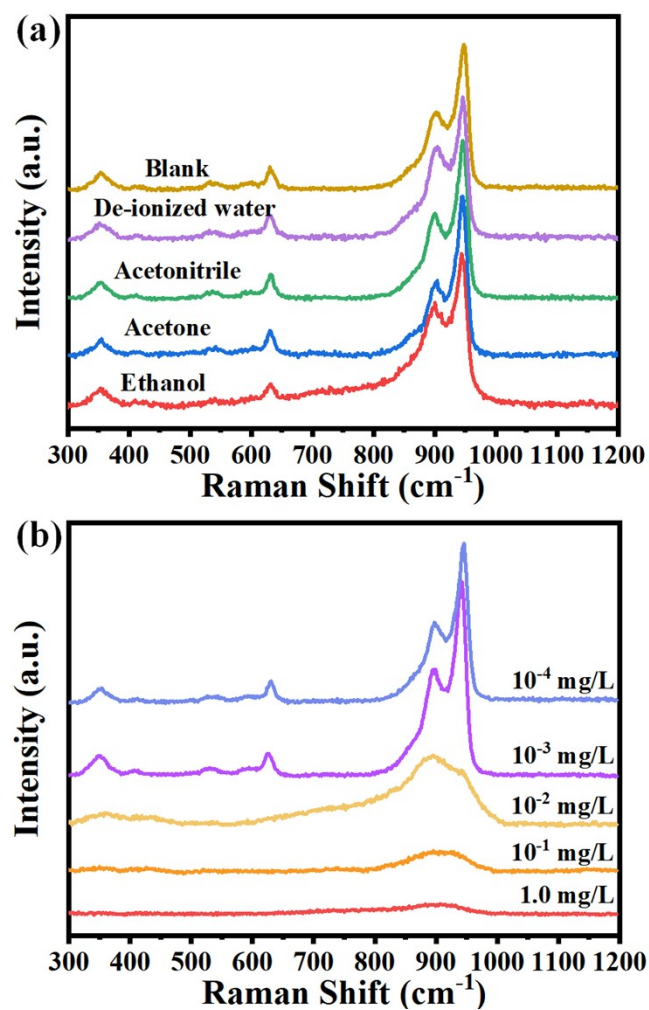

**Fig. S8** SERS spectra of  $\text{Ag}_6\text{MnMo}_9$  in different solvents (a) and different concentrations of  $\text{N}_2\text{H}_4$  ( $10^{-4}$ -1.0 mg/L) (b).

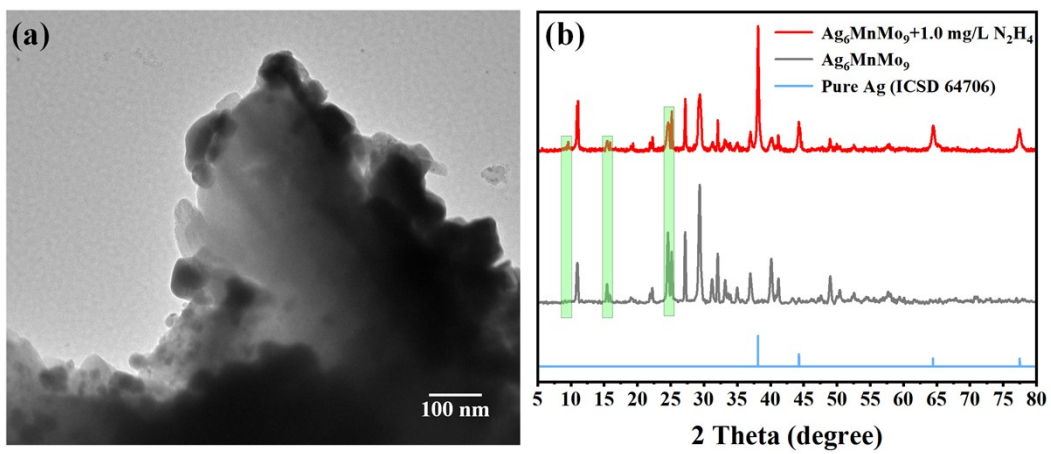

**Fig. S9** The TEM image (a) and PXRD pattern (b) of  $\text{Ag}_6\text{MnMo}_9$  in the presence of 1.0 mg/L  $\text{N}_2\text{H}_4$ .

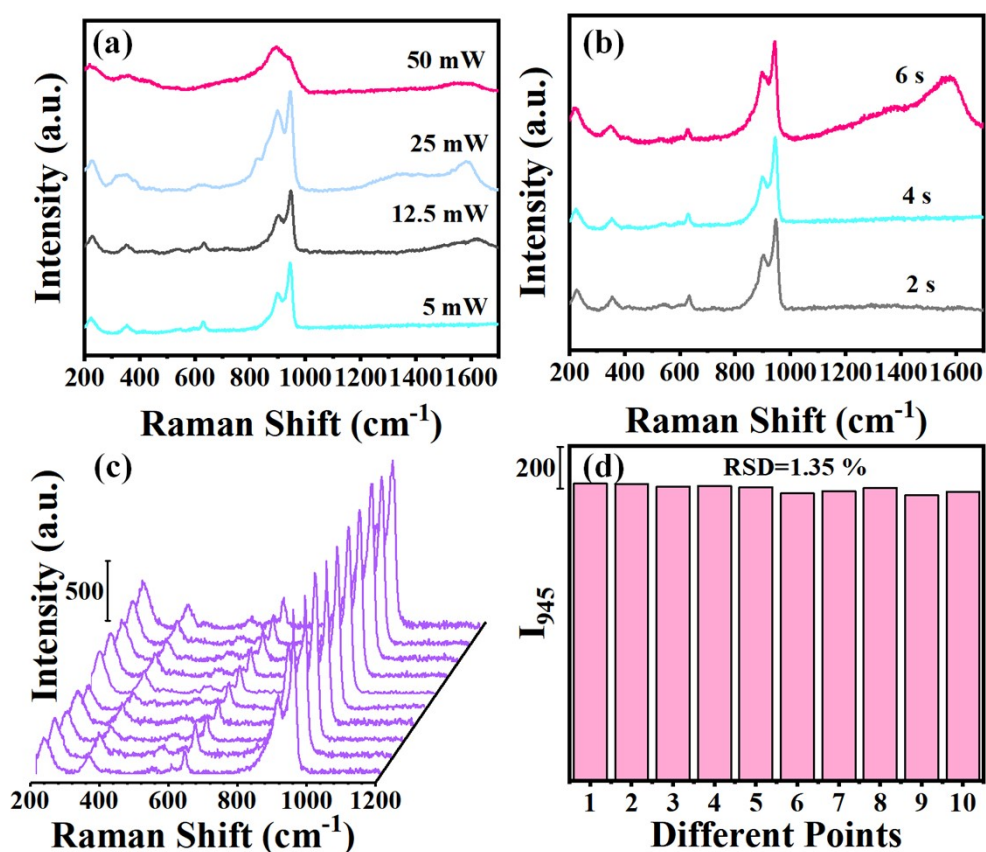

**Fig. S10** Raman spectra of  $\text{Ag}_6\text{MnMo}_9$  at laser power (a) and sampling time (b). (c) A set of Raman spectra of  $\text{Ag}_6\text{MnMo}_9$  from 10 random positions. (d) The Raman intensity at 945  $\text{cm}^{-1}$  from 10 random positions.



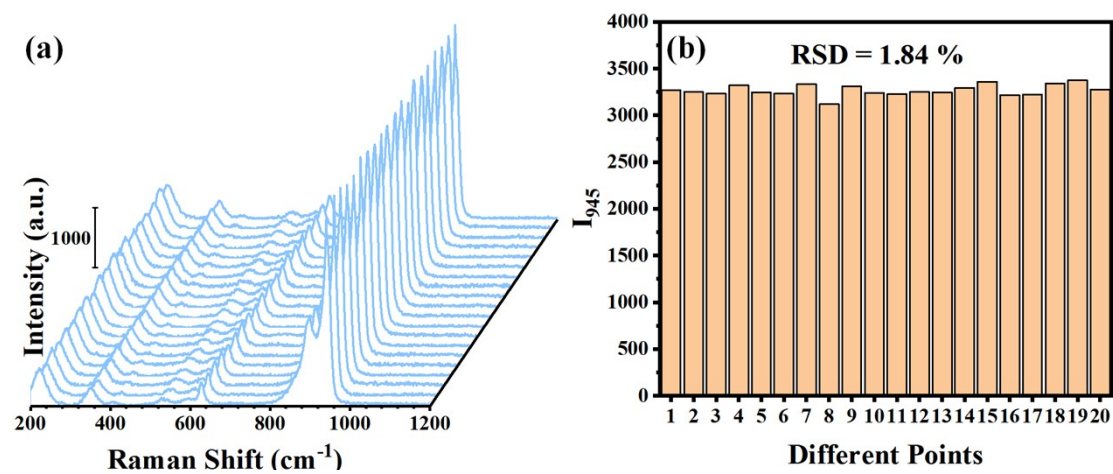

**Fig. S11** (a) A set of SERS spectra of  $\text{Ag}_6\text{MnMo}_9$  exposed  $10^{-3}$  mg/L  $\text{N}_2\text{H}_4$  from 20 random positions. (b) The SERS intensity at  $945\text{ cm}^{-1}$  from 20 random positions.

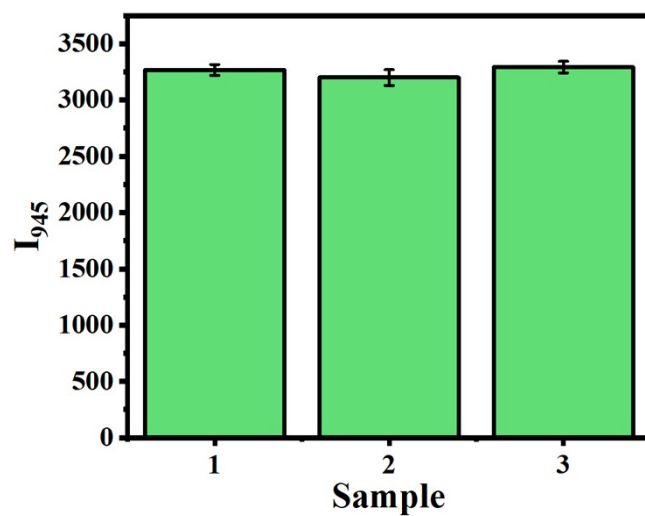

**Fig. S12** The histogram of SERS signal at 945 cm<sup>-1</sup> of three **Ag<sub>6</sub>MnMo<sub>9</sub>** SERS substrates exposed to 10<sup>-3</sup> mg/L N<sub>2</sub>H<sub>4</sub>.

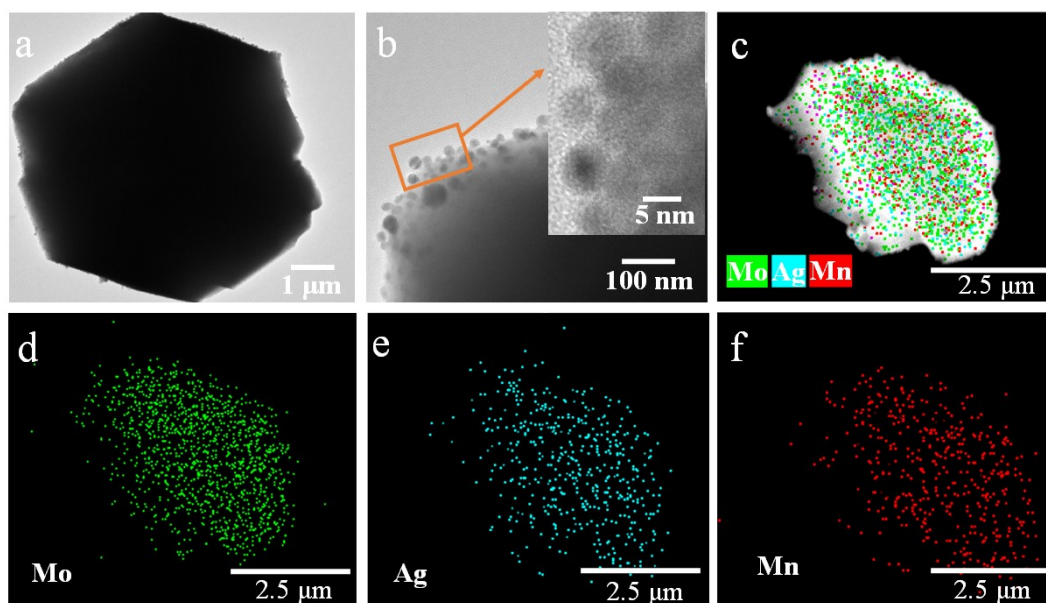

**Fig. S13** TEM images of  $\text{Ag}_6\text{MnMo}_9$  before (a) and after (b)  $\text{N}_2\text{H}_4$  treatment (inset of b: The HRTEM of  $\text{Ag}_6\text{MnMo}_9$  after  $\text{N}_2\text{H}_4$  treatment). The overlay distribution of elements (c) and elemental mappings of Mo (d), Ag (e) and Mn (f).

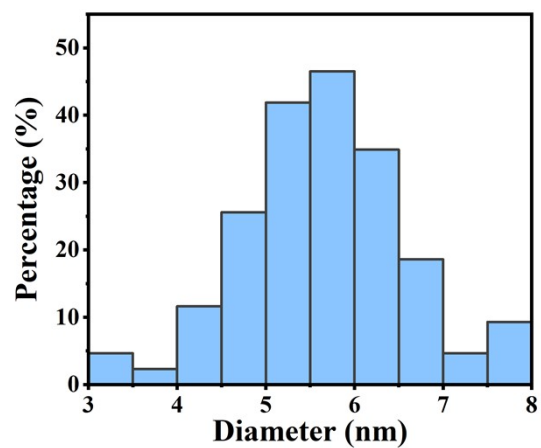

**Fig. S14** AgNPs size distribution for Ag<sub>6</sub>MnMo<sub>9</sub> after N<sub>2</sub>H<sub>4</sub> treatment.

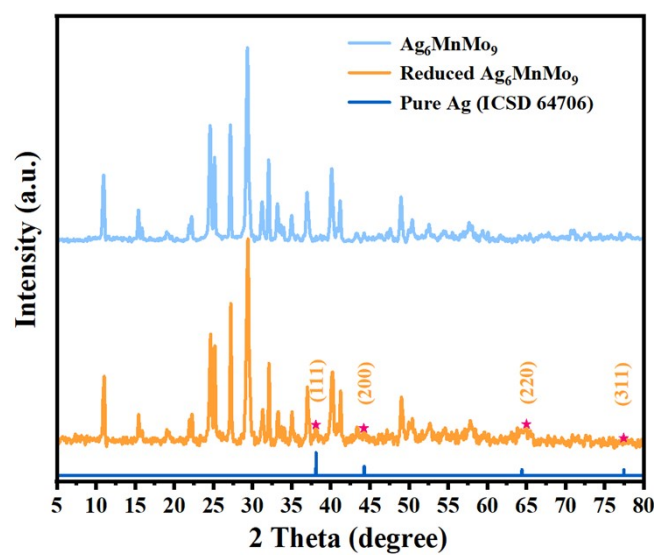

**Fig. S15** PXRd patterns of  $\text{Ag}_6\text{MnMo}_9$  without and with the presence of  $\text{N}_2\text{H}_4$ .

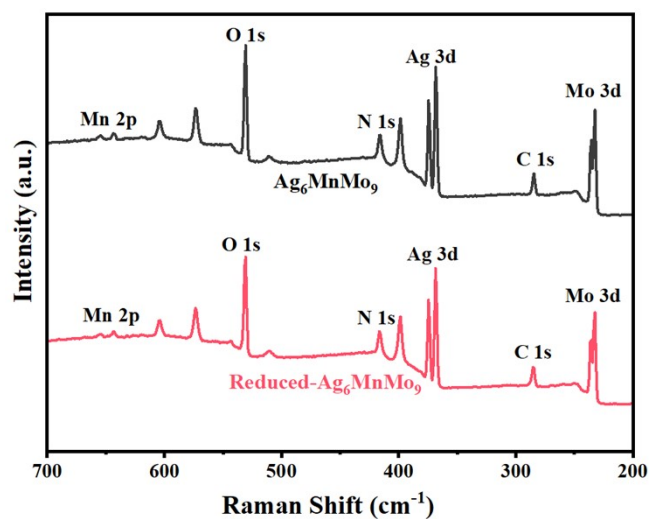

**Fig.S16** XPS survey spectra of  $\text{Ag}_6\text{MnMo}_9$  without and with the presence of  $\text{N}_2\text{H}_4$ .

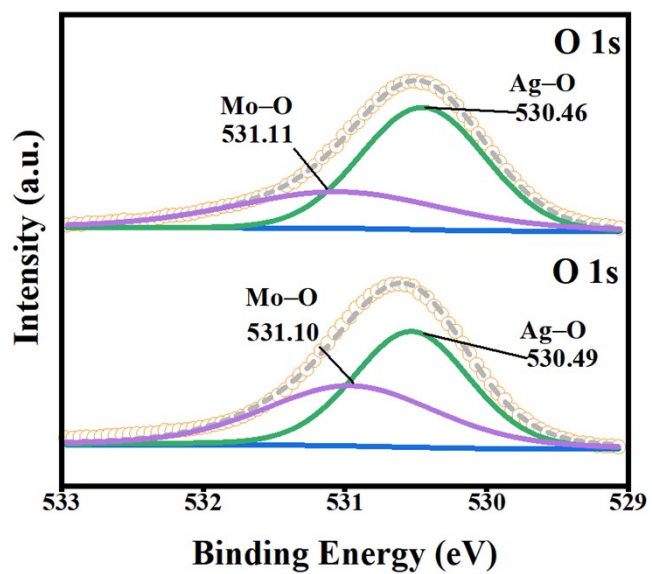

**Fig. S17** XPS analysis of  $\text{Ag}_6\text{MnMo}_9$  before and after reduction by  $\text{N}_2\text{H}_4$  for O 1s.

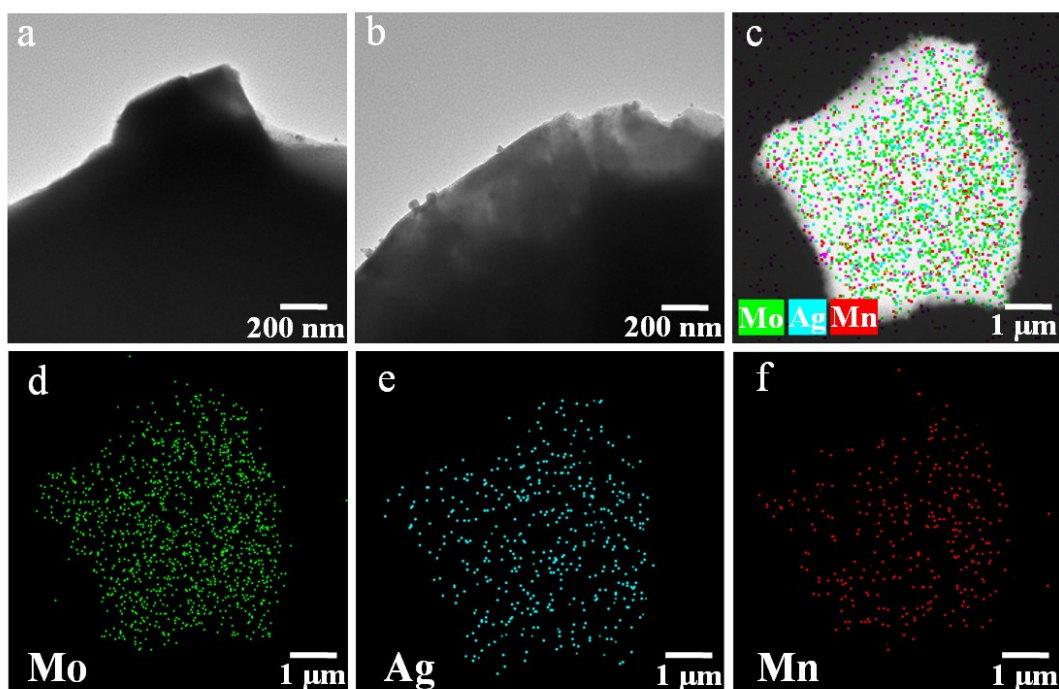

**Fig.S18** TEM images of  $\text{Ag}_3\text{MnMo}_9$  before (a) and after (b)  $\text{N}_2\text{H}_4$  treatment. The overlay distribution of elements (c) and Elemental mappings of Mo (d), Ag (e) and Mn (f) in  $\text{Ag}_3\text{MnMo}_9$ .



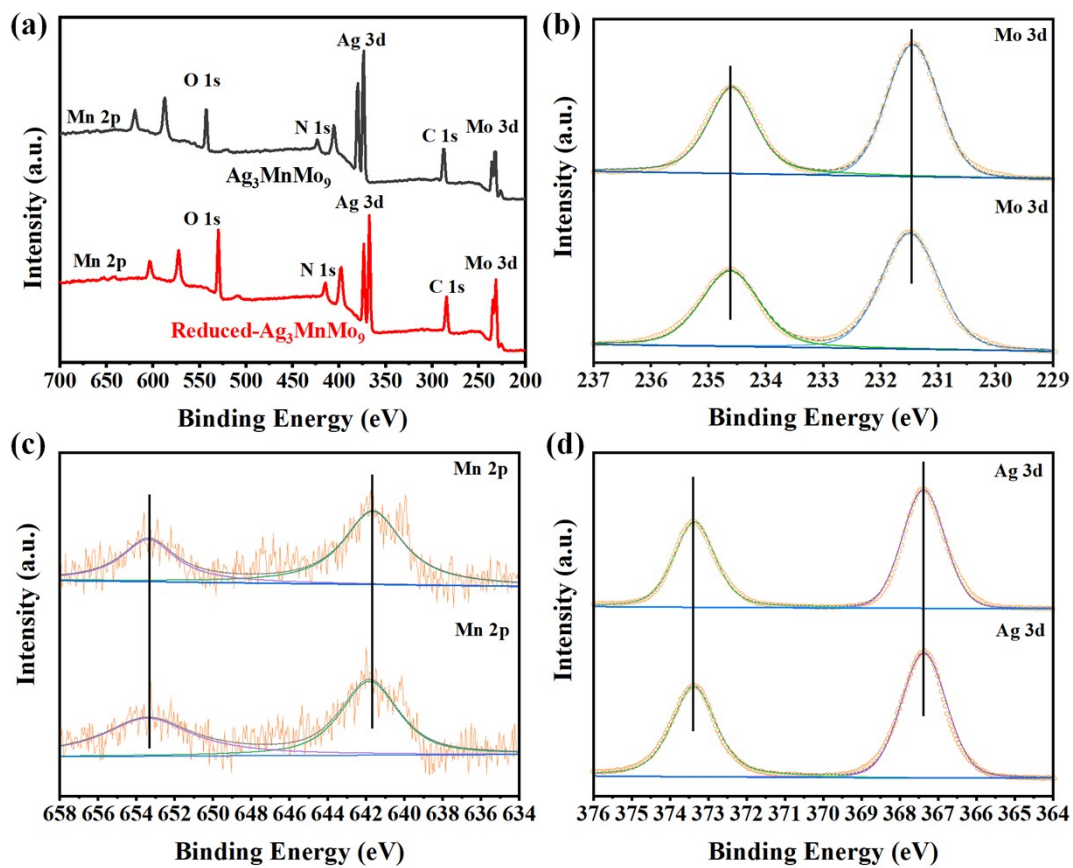

**Fig. S19** XPS spectra of survey (a), Mo 3d (b), Mn 2p (c) and Ag 3d (d) of  $\text{Ag}_3\text{MnMo}_9$ .

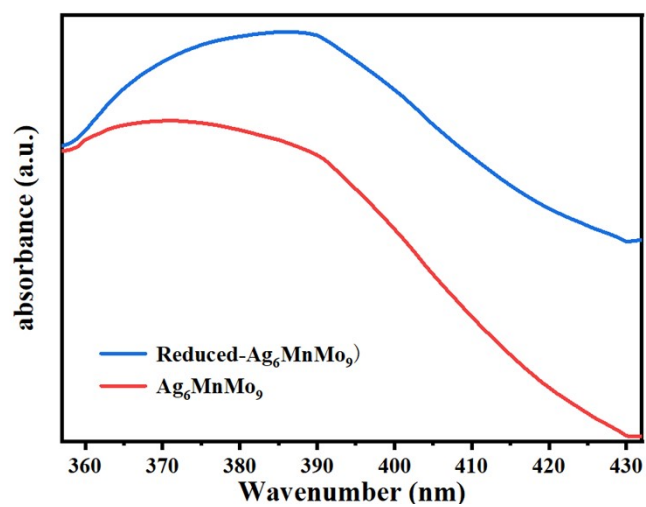

**Fig.S20** UV-vis absorbance spectra of  $\text{Ag}_6\text{MnMo}_9$  and its reduced state by reaction with  $\text{N}_2\text{H}_4$ .

**Table S1** Crystal Data and Structure for complexes **Ag<sub>6</sub>MnMo<sub>9</sub>** and **Ag<sub>3</sub>MnMo<sub>9</sub>**.

| Compound                                  | <b>Ag<sub>6</sub>MnMo<sub>9</sub></b>                                          | <b>Ag<sub>3</sub>MnMo<sub>9</sub></b>                                                                                         |
|-------------------------------------------|--------------------------------------------------------------------------------|-------------------------------------------------------------------------------------------------------------------------------|
| Empirical formula                         | H <sub>4</sub> O <sub>36</sub> Ag <sub>6</sub> Mn <sub>1</sub> Mo <sub>9</sub> | H <sub>24</sub> C <sub>6</sub> H <sub>24</sub> N <sub>9</sub> O <sub>41</sub> Ag <sub>6</sub> Mn <sub>1</sub> Mo <sub>9</sub> |
| Formula weight                            | 2145.62                                                                        | 2427.77                                                                                                                       |
| T (K)                                     | 293(2)                                                                         | 293(2)                                                                                                                        |
| Space group                               | <i>C</i> 222 <sub>1</sub>                                                      | <i>P</i> <i>a</i> <sup>3</sup>                                                                                                |
| Crystal system                            | Orthorhombic                                                                   | Cubic                                                                                                                         |
| <i>a</i> / Å                              | 10.9514(9)                                                                     | 21.4897(2)                                                                                                                    |
| <i>b</i> / Å                              | 24.5879(17)                                                                    | 21.4897(2)                                                                                                                    |
| <i>c</i> / Å                              | 15.3537(10)                                                                    | 21.4897(2)                                                                                                                    |
| <i>a</i> / °                              | 90)                                                                            | 90                                                                                                                            |
| <i>β</i> / °                              | 90                                                                             | 90                                                                                                                            |
| <i>γ</i> / °                              | 90                                                                             | 90                                                                                                                            |
| <i>V</i> / Å <sup>3</sup>                 | 4134.3(5)                                                                      | 9924.1(3)                                                                                                                     |
| <i>Z</i>                                  | 4                                                                              | 8                                                                                                                             |
| <i>D<sub>c</sub></i> / g cm <sup>-3</sup> | 3.441                                                                          | 3.218                                                                                                                         |
| <i>F</i> (000)                            | 3892.0                                                                         | 8832.0                                                                                                                        |
| Reflns collected / unique                 | 6190 / 2919                                                                    | 26361 / 2924                                                                                                                  |
| <i>R</i> <sub>(int)</sub>                 | 0.0444                                                                         | 0.0619                                                                                                                        |
| Goodness-of-fit on <i>F</i> <sup>2</sup>  | 1.047                                                                          | 0.953                                                                                                                         |
| final <i>R</i> indices                    | <i>R</i> <sub>1</sub> <sup>a</sup> = 0.0791                                    | <i>R</i> <sub>1</sub> <sup>a</sup> = 0.0294                                                                                   |
| [ <i>I</i> > 2σ( <i>I</i> )]              | <i>wR</i> <sub>2</sub> <sup>b</sup> = 0.2013                                   | <i>wR</i> <sub>2</sub> <sup>b</sup> = 0.0701                                                                                  |
| <i>R</i> indices                          | <i>R</i> <sub>1</sub> <sup>a</sup> = 0.0803                                    | <i>R</i> <sub>1</sub> <sup>a</sup> = 0.0332                                                                                   |
| (All data)                                | <i>wR</i> <sub>2</sub> <sup>b</sup> = 0.2026                                   | <i>wR</i> <sub>2</sub> <sup>b</sup> = 0.0721                                                                                  |
| CCDC                                      | 2086764                                                                        | 2097830                                                                                                                       |

<sup>a</sup>  $R_1 = \sum ||F_o| - |F_c|| / \sum |F_o|$ . <sup>b</sup>  $wR_2 = \{ \sum [w(F_o^2 - F_c^2)^2] / \sum [w(F_o^2)^2] \}^{1/2}$ .

**Table S2.** Raman and SERS vibrational frequencies ( $\text{cm}^{-1}$ ) of  $\text{Ag}_6\text{MnMo}_9$ <sup>a</sup>.

| SERS | Raman | Vibrational assignments        |
|------|-------|--------------------------------|
| 945  | 945   | $\nu$ Mo–O <sub>d</sub>        |
| 898  | 898   | $\nu$ Mo–O <sub>b</sub> –Mo    |
|      | 630   | $\nu$ Mn–O <sub>a</sub> –Mo    |
| 531  | 534   | $\nu$ Mo–O <sub>c</sub> –Mo    |
| 347  | 353   | $\delta$ Mo–O <sub>c</sub> –Mo |

<sup>a</sup>  $\nu$ , stretching;  $\delta$ , bending.

**Table S3.** Comparison of different methods for detecting N<sub>2</sub>H<sub>4</sub>.

| Method         | Linear range                              | Limit of detection | References       |
|----------------|-------------------------------------------|--------------------|------------------|
| fluorometry    | 0.75 – 1.5 $\mu$ M                        | 204 nM             | 2                |
| fluorometry    | 0 – 15 $\mu$ M                            | 0.16 $\mu$ M       | 3                |
| fluorometry    | 0 – 75 $\mu$ M                            | 82 nM              | 4                |
| fluorometry    | 0 – 15 $\mu$ M                            | 0.075 $\mu$ M      | 5                |
| fluorometry    | 0 – 6 $\mu$ M                             | 90 nM              | 6                |
| fluorometry    | 0 – 500 $\mu$ M                           | 0.3 $\mu$ M        | 7                |
| fluorometry    | 0 – 50 $\mu$ M                            | 81.8 nM            | 8                |
| chromatography | 0 – 0.06 mM                               | 0.013 mM           | 9                |
| chromatography | 0.05 – 1 $\mu$ M                          | 9.6 nM             | 10               |
| SERS           | 10 <sup>-10</sup> – 10 <sup>-9</sup> M    | 85 pM              | 11               |
| SERS           | 10 <sup>-9</sup> – 10 <sup>-7</sup> M     | 38 pM              | 12               |
| SERS           | 10 <sup>-3</sup> – 10 <sup>-10</sup> mg/L | 40 pg/L (2 pM)     | <b>This work</b> |

## References

- 1 L. C. W. Baker, T. J. R. Weakley, *J. Inorg. Nucl. Chem.* 1966, **28**, 447-454.
- 2 S. K. Samanta, K. Maiti, S. S. Ali, U. N. Guria, A. Ghosh, P. Datta, A. K. Mahapatra, *Dyes Pigm.*, 2020, **173**, 107997.
- 3 J. P. Wang, C. R. Wang, S. Jiang, W. Y. Ma, B. Xu, L. J. Liu, W. J. Tian, *J. Mater. Chem. C*, 2022, **10**, 2807-2813.
- 4 Y. Wang, X. L. Xue, Q. Zhang, K. P. Wang, S. J. Chen, L. S. Tang, Z. Q. Hu, *Spectrochim. Acta A Mol. Biomol. Spectrosc.*, 2022, **279**, 121406.
- 5 L. Y. Wang, S. Q. Xin, F. R. Xie, X. G. Ran, H. Tang, D. R. Cao, *J. Mater. Chem. C*, 2022, **10**, 14605-14615.
- 6 Q. Q. Lai, S. F. Si, T. Y. Qin, B. J. Li, H. X. Wu, B. Liu, H. H. Xu, C. Zhao, *Sens. Actuators B Chem.*, 2020, **307**, 127640.
- 7 C. H. Zeng, Z. Y. Xu, C. Song, T. Y. Qin, T. H. Jia, C. Zhao, L. Wang, B. Liu, X. J. Peng, *J. Hazard. Mater.*, 2023, **445**, 130415.
- 8 S. Q. Zhang, Y. Xie, L. Q. Yan, *Acta A Mol. Biomol. Spectrosc.*, 2020, **230**, 118028.
- 9 R. Sharma, S. H. Jung, H. I. Lee, *ACS Appl. Polym. Mater.*, 2021, **3**, 6632-6641.
- 10 Y. Zhang, Y. Zhang, D. Zhang, S. D. Li, C. Jiang, Y. Su, *Sens. Actuators B Chem.*, 2019, **285**, 607-616
- 11 X. Gu, J. P. Camden, *Anal. Chem.*, 2015, **87**, 6460-6464.
- 12 G. D. Xu, N. Guo, Q. J. Zhang, T. T. Wang, P. Song, L. X. Xia, *J. Hazard. Mater.*, 2022, **424**, 127303.
